# Supplementary material for: Screening effective single-atom ORR and OER electrocatalysts from Pt decorated MXenes by first-principles calculations
Source: Royal Society of Chemistry journal article supplement (doi:10.1039/d0ta04429f), 2020-01-01
Supplement: d0ta04429f1.pdf [file d0ta04429f1.pdf]

## Screening Effective Single-atom ORR and OER Electrocatalysts from Pt Decorated MXenes by First-principles Calculations

Dongxiao Kan<sup>a</sup>, Ruqian Lian<sup>a</sup>, Dashuai Wang<sup>a</sup>, Xilin Zhang<sup>b</sup>, Jing Xu<sup>a, c</sup>, Xinying Gao<sup>a</sup>, Yue Yu<sup>a</sup>,  
Gang Chen<sup>a</sup>, and Yingjin Wei<sup>a\*</sup>

<sup>a</sup>Key Laboratory of Physics and Technology for Advanced Batteries (Ministry of Education), Jilin Engineering Laboratory of New Energy Materials and Technology, College of Physics, Jilin University, Changchun 130012, P.R. China.

<sup>b</sup>College of Physics and Materials Science, Henan Normal University, Xinxiang, Henan 453007, P.R. China.

<sup>c</sup>Department of Physics, College of Science, Yanbian University, Yanji 133002, P.R. China.

\*Corresponding Author: yjwei@jlu.edu.cn; 86-431-85155126

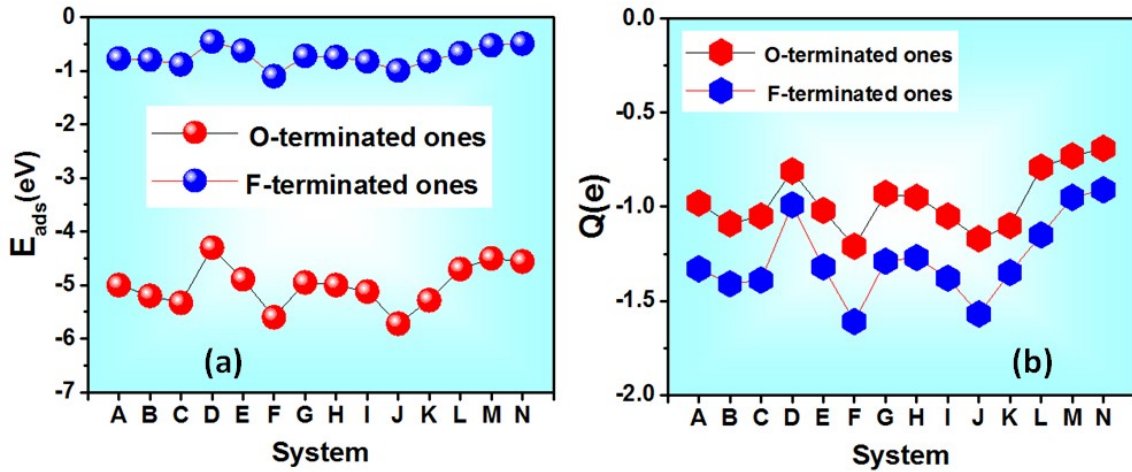

**Figure S1 a)** The adsorption energies ( $E_{ads}$ ) of O/F groups on bare MXenes; **b)** The charges that O/F terminators gained from the bare MXenes, where A-N represented  $Ti_2CT_2-V_T-Pt$ ,  $V_2CT_2-V_T-Pt$ ,  $Nb_2CT_2-V_T-Pt$ ,  $Mo_2CT_2-V_T-Pt$ ,  $Ti_3C_2T_2-V_T-Pt$ ,  $Zr_3C_2T_2-V_T-Pt$ ,  $Ti_3(C,N)_2-CT_2-V_T-Pt$ ,  $Ti_3(C,N)_2-NT_2-V_T-Pt$ ,  $Nb_4C_3T_2-V_T-Pt$ ,  $Ta_4C_3T_2-V_T-Pt$ ,  $Ti_4N_3T_2-V_T-Pt$ ,  $Cr_2TiC_2F_2-V_F-Pt$ ,  $Mo_2TiC_2T_2-V_T-Pt$ ,  $Mo_2Ti_2C_3T_2-V_T-Pt$  ( $T = O; F$ ), respectively.

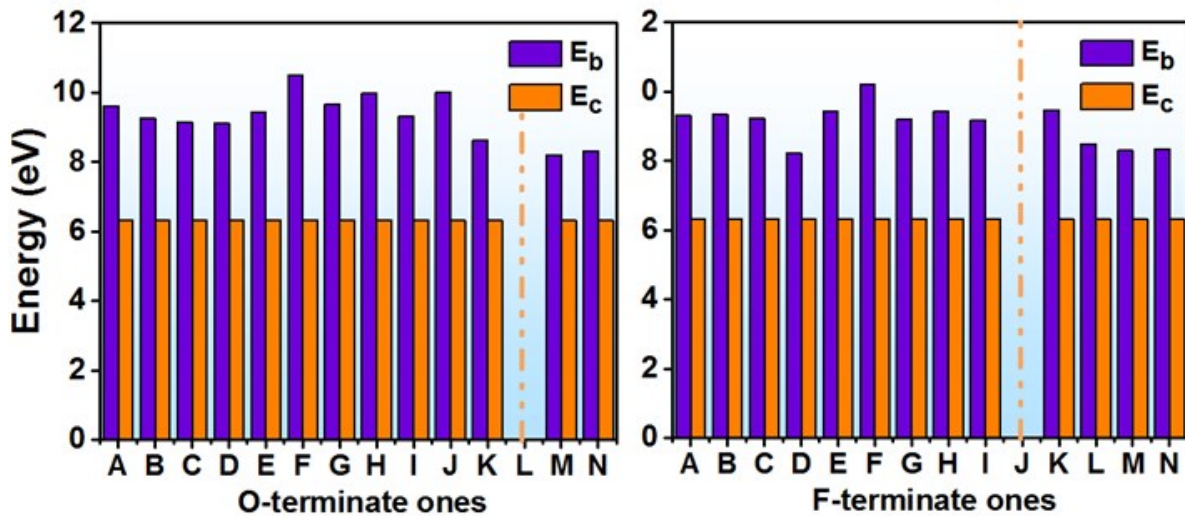

**Figure S2** The binding energies ( $E_b$ ) of Pt SA on the defected MXenes and the cohesive energies ( $E_c$ ) of Pt, where A-N represented  $Ti_2CT_2-V_T-Pt$ ,  $V_2CT_2-V_T-Pt$ ,  $Nb_2CT_2-V_T-Pt$ ,  $Mo_2CT_2-V_T-Pt$ ,  $Ti_3C_2T_2-V_T-Pt$ ,  $Zr_3C_2T_2-V_T-Pt$ ,  $Ti_3(C,N)_2-CT_2-V_T-Pt$ ,  $Ti_3(C,N)_2-NT_2-V_T-Pt$ ,  $Nb_4C_3T_2-V_T-Pt$ ,  $Ta_4C_3T_2-V_T-Pt$ ,  $Ti_4N_3T_2-V_T-Pt$ ,  $Cr_2TiC_2F_2-V_F-Pt$ ,  $Mo_2TiC_2T_2-V_T-Pt$ , and  $Mo_2Ti_2C_3T_2-V_T-Pt$  ( $T = O; F$ ), respectively.

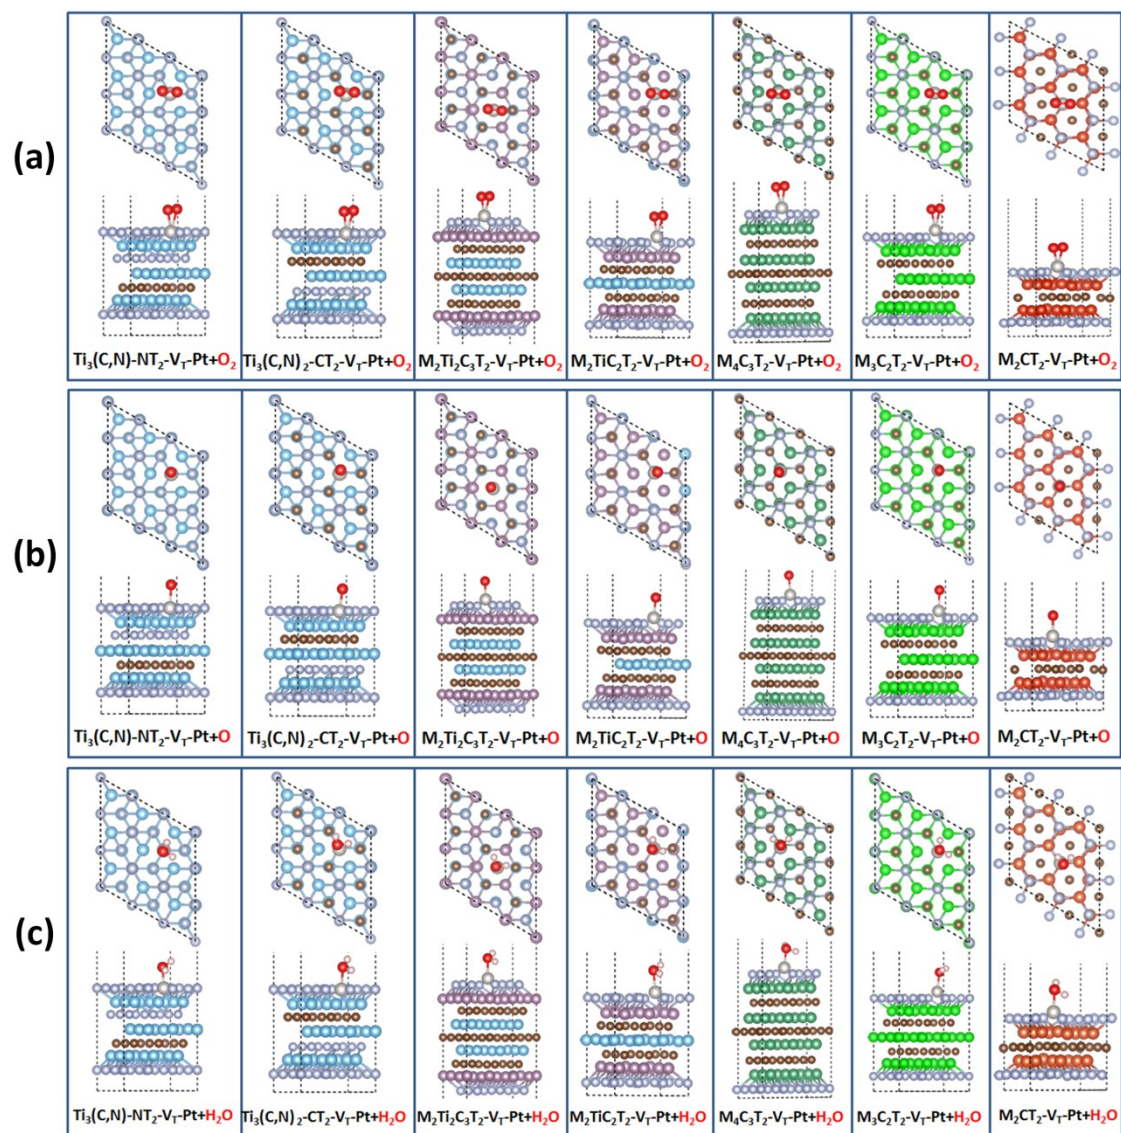

**Figure S3.** The geometric structures of O-atom, O<sub>2</sub>, and H<sub>2</sub>O adsorbed on the surface of Pt decorated SACs **a)-c)**, respectively).

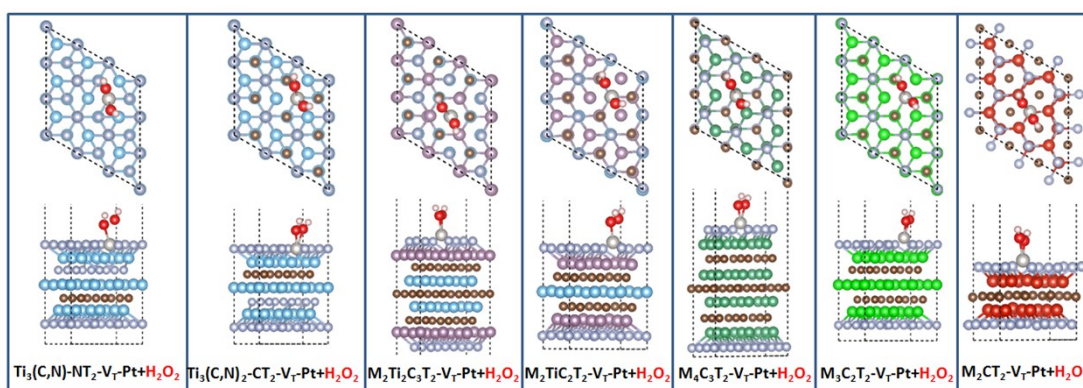

**Figure S4.** The geometric structures of  $\text{H}_2\text{O}_2$  adsorbed on the surface of Pt decorated SACs.

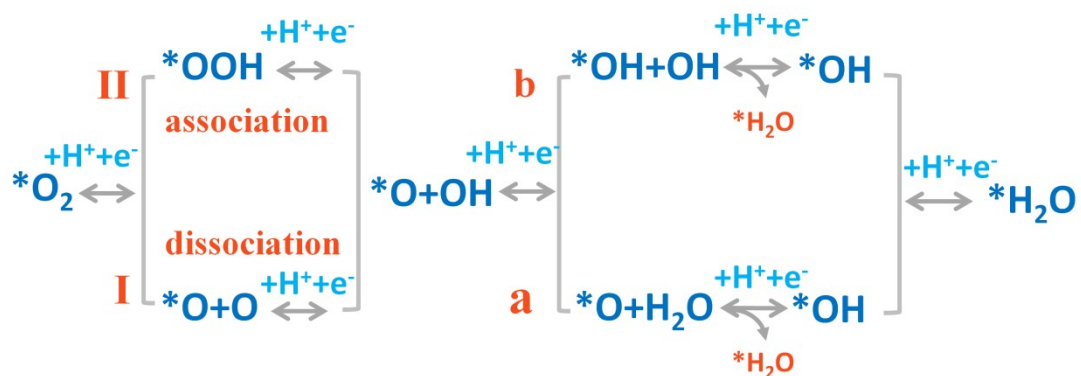

**Figure S5.** The  $4 e^-$  reaction processes of ORR, where the I-II paths represent the dissociation and association mechanisms, respectively.

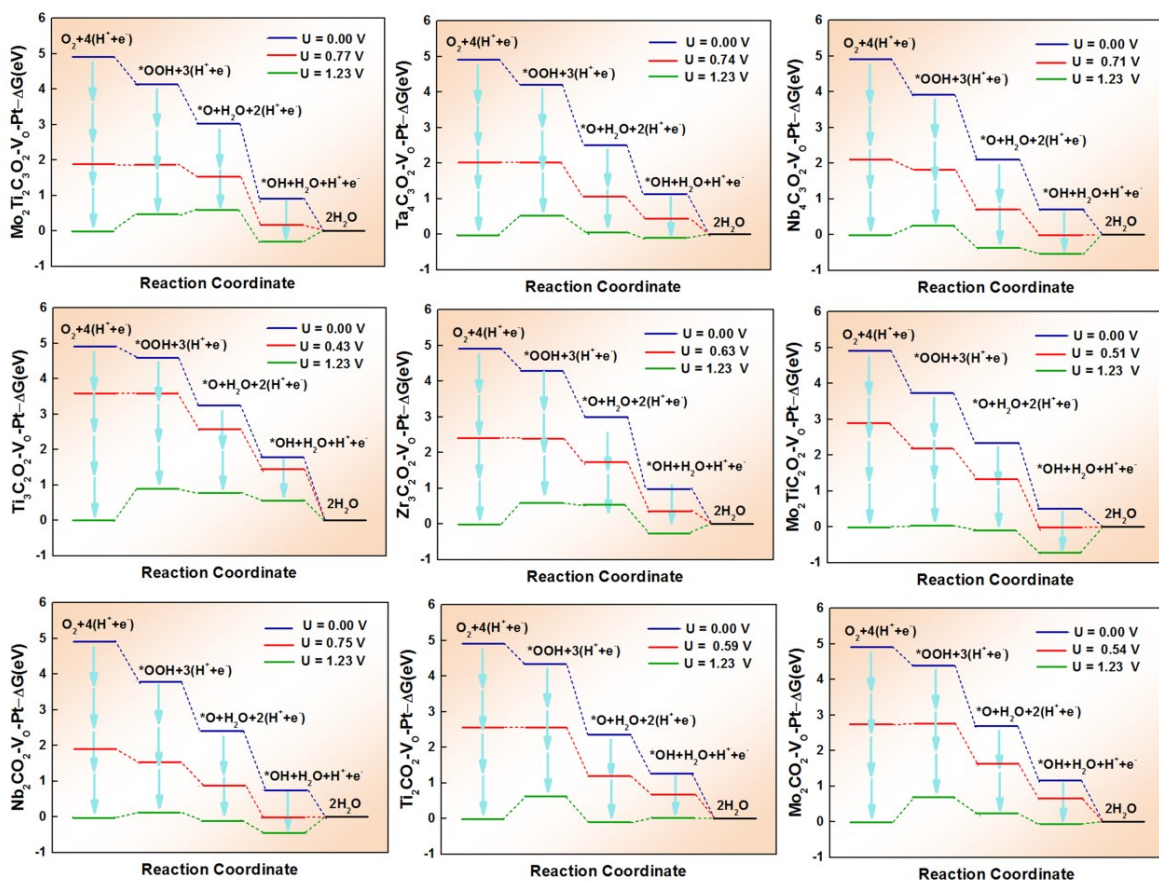

**Figure S6.** The free energy diagrams and theoretical voltages of ORR on the O-terminated SACs.

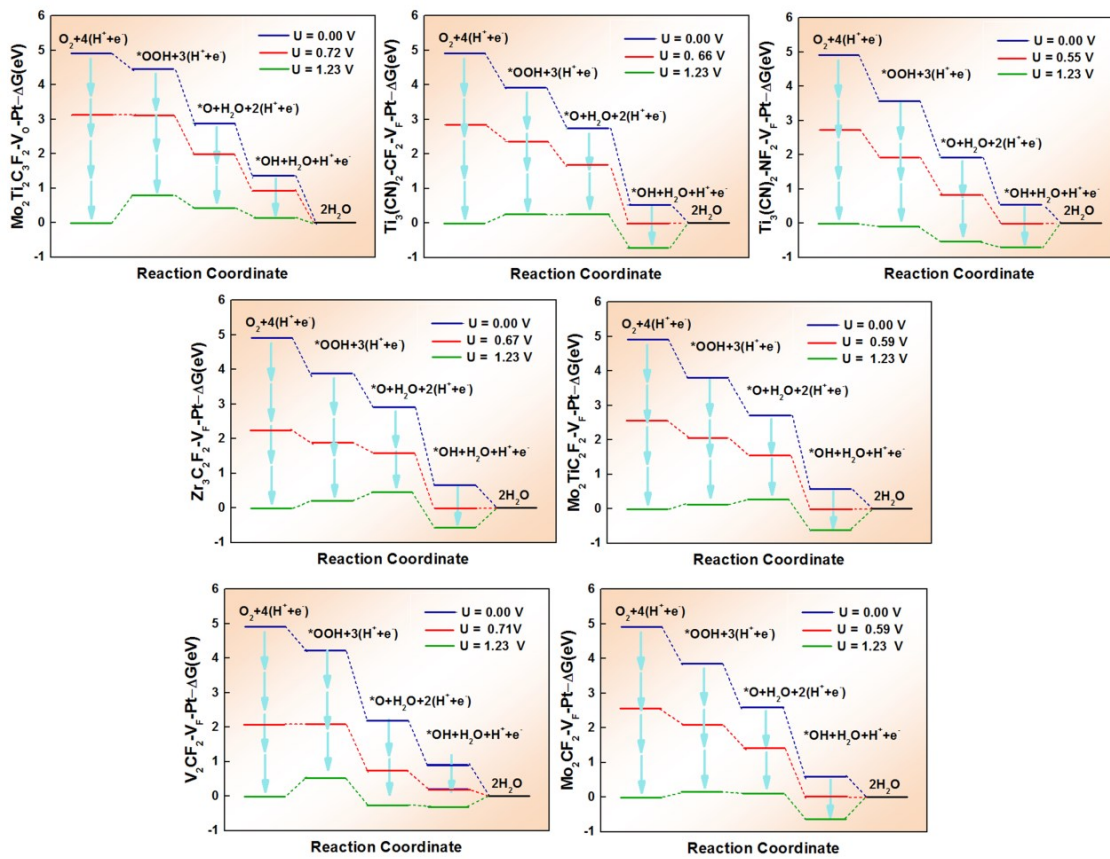

**Figure S7.** The free energy diagrams and theoretical voltages of ORR on the F-terminated SACs.

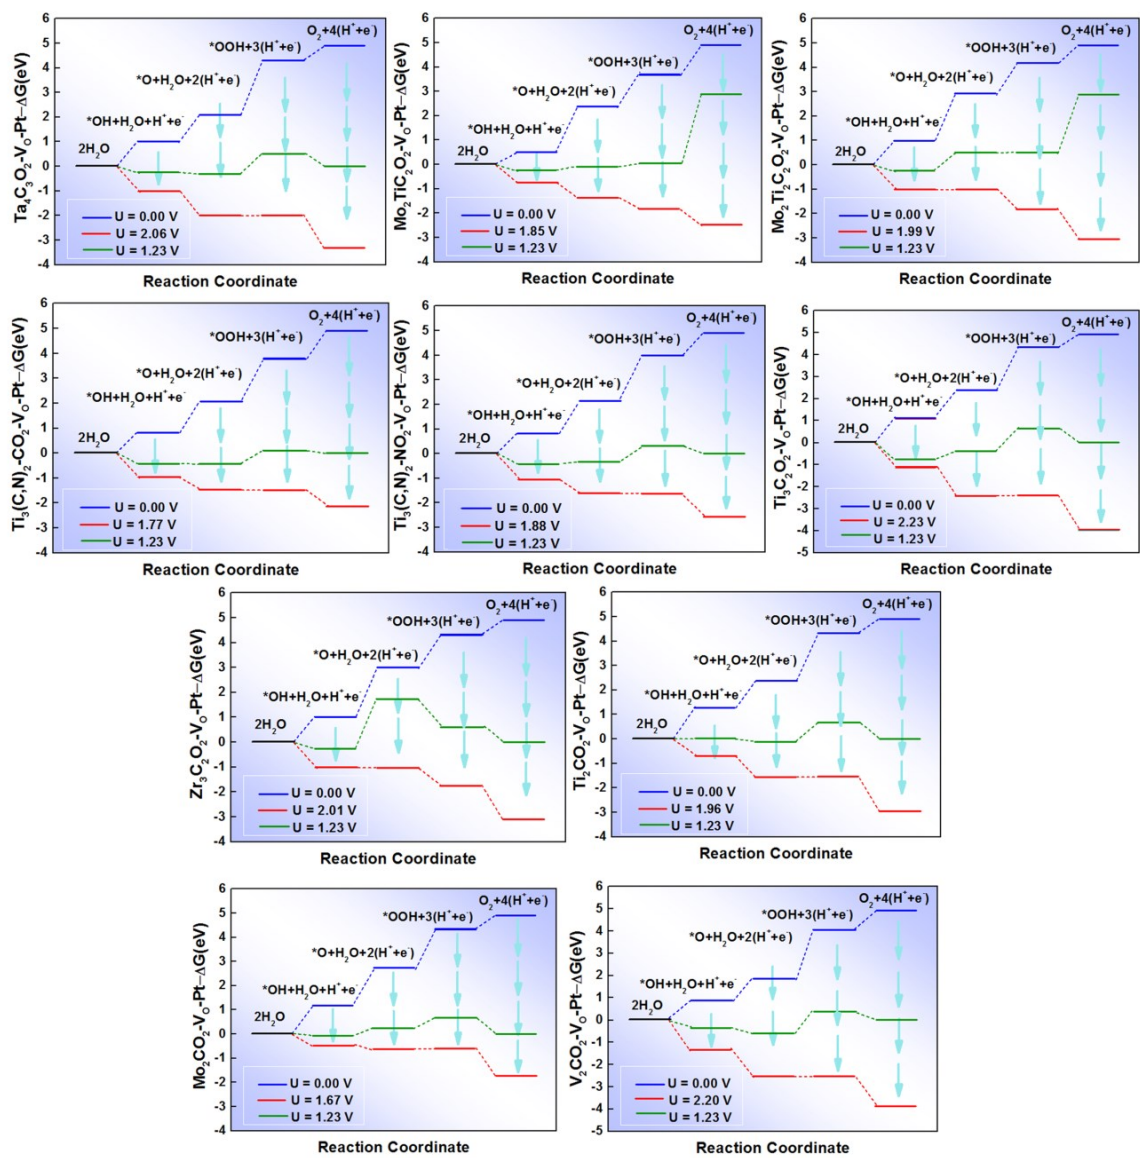

**Figure S8.** The free energy diagrams and theoretical voltages of OER on the O-terminated SACs.

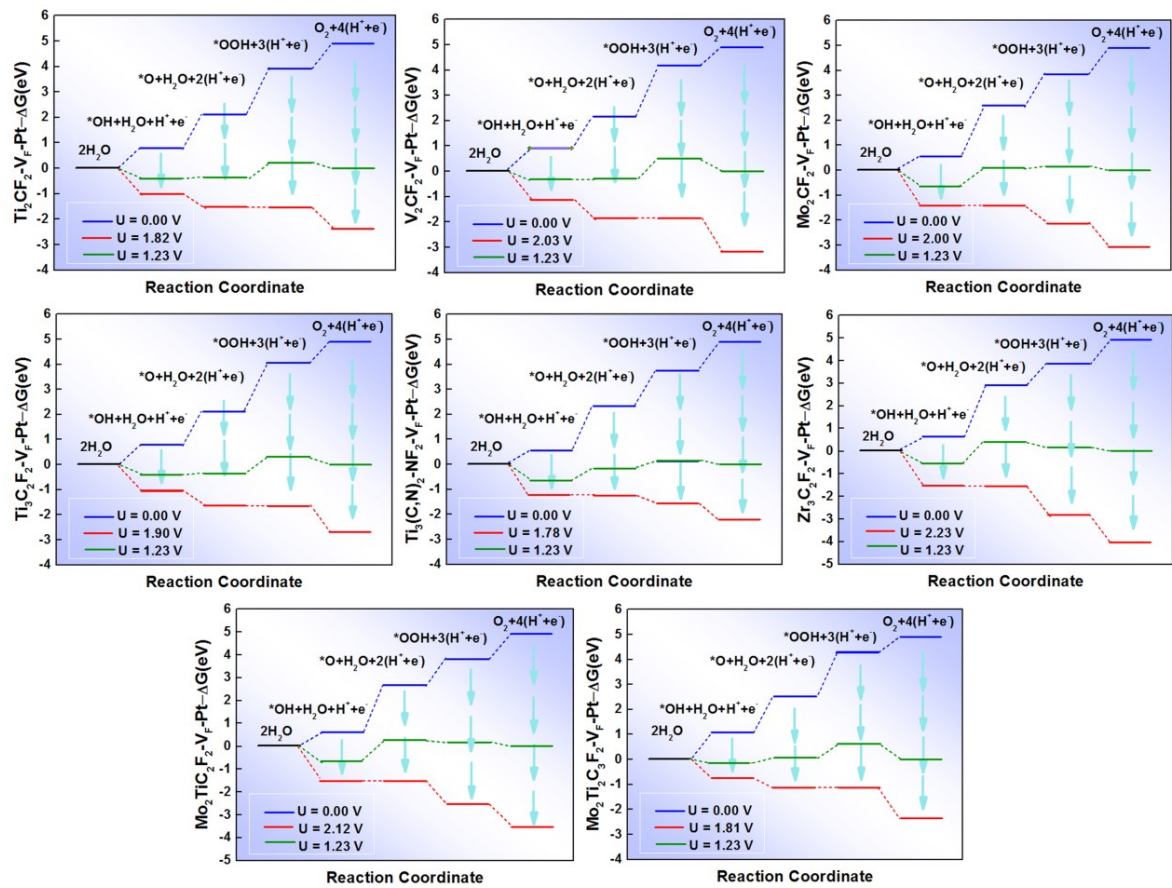

**Figure S9** The free energy diagrams and theoretical voltages of OER on the F-terminated SACs.



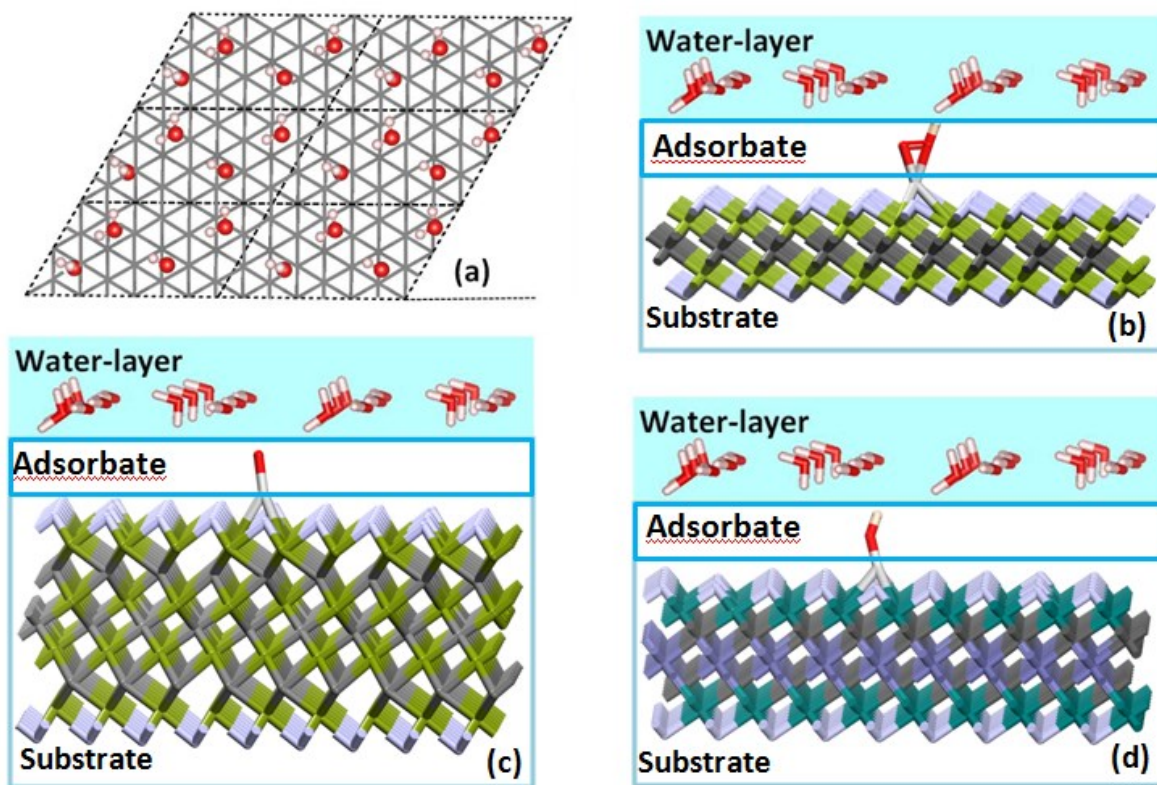

**Figure S10** Top view of the solvation system (a) and the solvation model of Nb<sub>2</sub>C<sub>2</sub>F<sub>2</sub>-V<sub>F</sub>-Pt, Nb<sub>4</sub>C<sub>3</sub>F<sub>2</sub>-V<sub>F</sub>-Pt, and Cr<sub>2</sub>TiC<sub>2</sub>F<sub>2</sub>-V<sub>F</sub>-Pt with adsorbed intermediates (b-d, respectively).

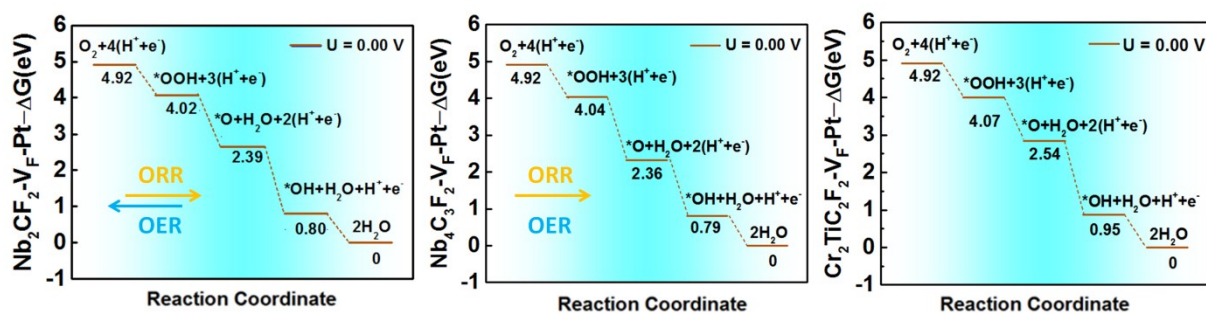

**Figure S11** The free energy diagrams and theoretical voltages of ORR/OER on Nb<sub>2</sub>C<sub>2</sub>F<sub>2</sub>-V<sub>F</sub>-Pt, Nb<sub>4</sub>C<sub>3</sub>F<sub>2</sub>-V<sub>F</sub>-Pt, and Cr<sub>2</sub>TiC<sub>2</sub>F<sub>2</sub>-V<sub>F</sub>-Pt with the considering of the solvation effect.

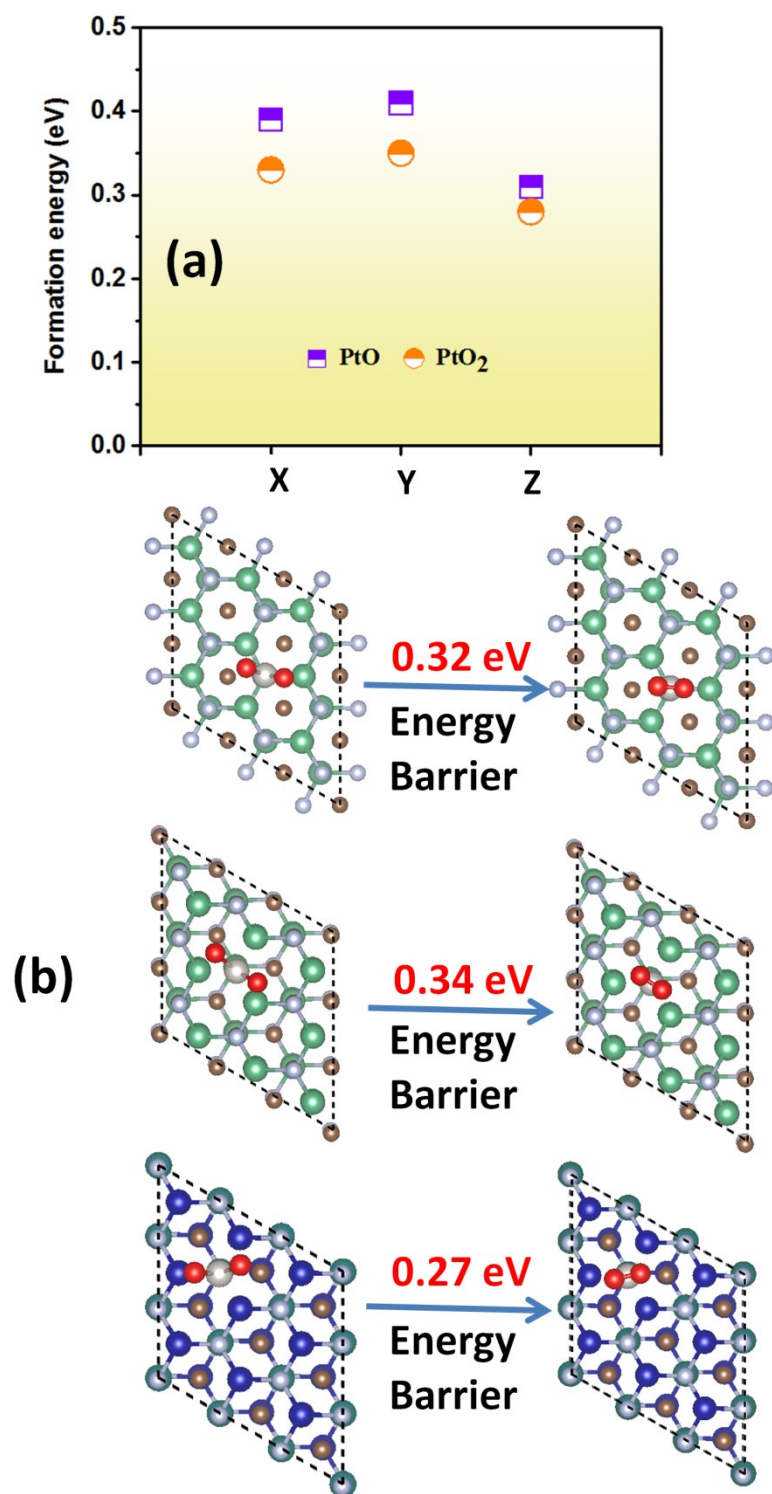

**Figure S12** (a) The formation energy of PtO and PtO<sub>2</sub> on SACs, where X, Y, Z represent Nb<sub>2</sub>C<sub>2</sub>F<sub>2</sub>-V<sub>F</sub>-Pt, Nb<sub>4</sub>C<sub>3</sub>F<sub>2</sub>-V<sub>F</sub>-Pt, and Cr<sub>2</sub>TiC<sub>2</sub>F<sub>2</sub>-V<sub>F</sub>-Pt, respectively; (b) the energy barriers of \*2O → O<sub>2</sub> on Nb<sub>2</sub>C<sub>2</sub>F<sub>2</sub>-V<sub>F</sub>-Pt, Nb<sub>4</sub>C<sub>3</sub>F<sub>2</sub>-V<sub>F</sub>-Pt, and Cr<sub>2</sub>TiC<sub>2</sub>F<sub>2</sub>-V<sub>F</sub>-Pt.

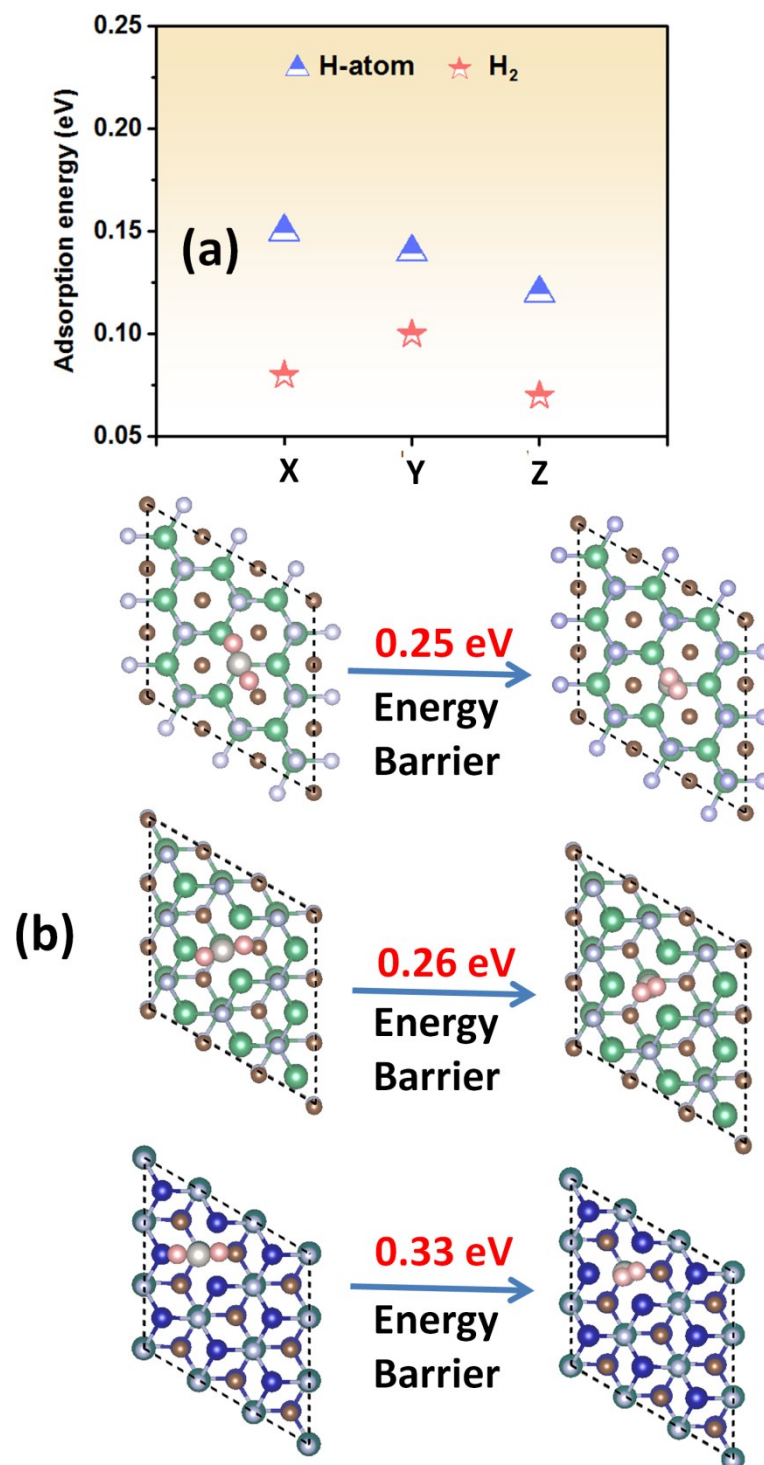

**Figure S13** (a) The adsorption energy of H-atom and H<sub>2</sub> on SACs, where X, Y, Z represent Nb<sub>2</sub>C<sub>2</sub>F<sub>2</sub>-V<sub>F</sub>-Pt, Nb<sub>4</sub>C<sub>3</sub>F<sub>2</sub>-V<sub>F</sub>-Pt, and Cr<sub>2</sub>TiC<sub>2</sub>F<sub>2</sub>-V<sub>F</sub>-Pt, respectively; (b) the energy barriers of 2\*H→H<sub>2</sub> on Nb<sub>2</sub>C<sub>2</sub>F<sub>2</sub>-V<sub>F</sub>-Pt, Nb<sub>4</sub>C<sub>3</sub>F<sub>2</sub>-V<sub>F</sub>-Pt, and Cr<sub>2</sub>TiC<sub>2</sub>F<sub>2</sub>-V<sub>F</sub>-Pt.

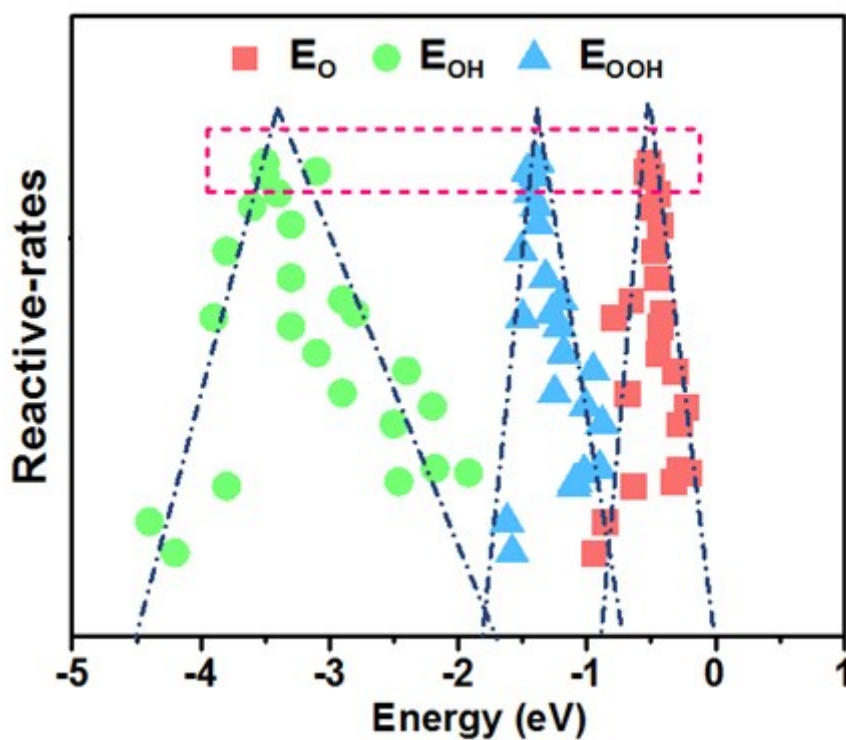

**Figure S14** The volcano plots of the SACs, which describe the relationship between activities and adsorption energies for intermediates.

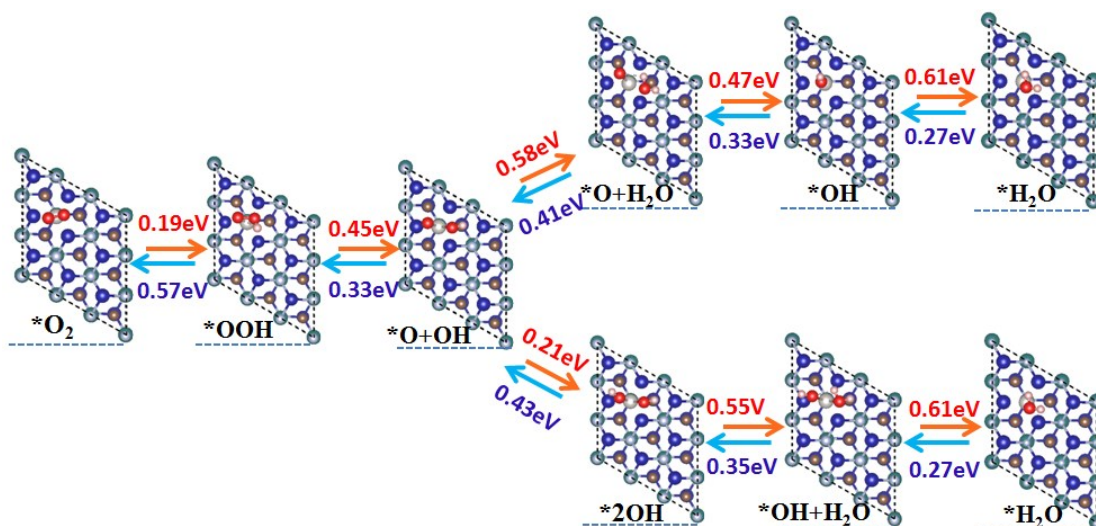

**Figure S15** The possible reaction pathways and energy barrier for the ORR/OER process on  $\text{Cr}_2\text{TiC}_2\text{F}_2\text{-VF-Pt}$ .

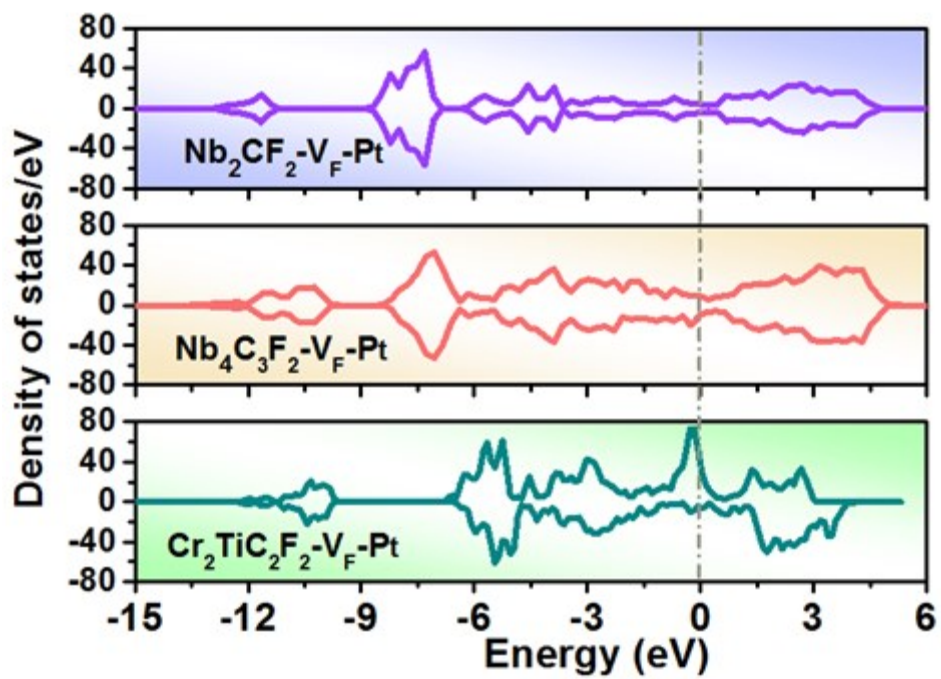

**Figure S16** The density of states (DOS) of  $\text{Nb}_2\text{C}_2\text{F}_2\text{-V}_\text{F}\text{-Pt}$ ,  $\text{Nb}_4\text{C}_3\text{F}_2\text{-V}_\text{F}\text{-Pt}$ , and  $\text{Cr}_2\text{TiC}_2\text{F}_2\text{-V}_\text{F}\text{-Pt}$ .

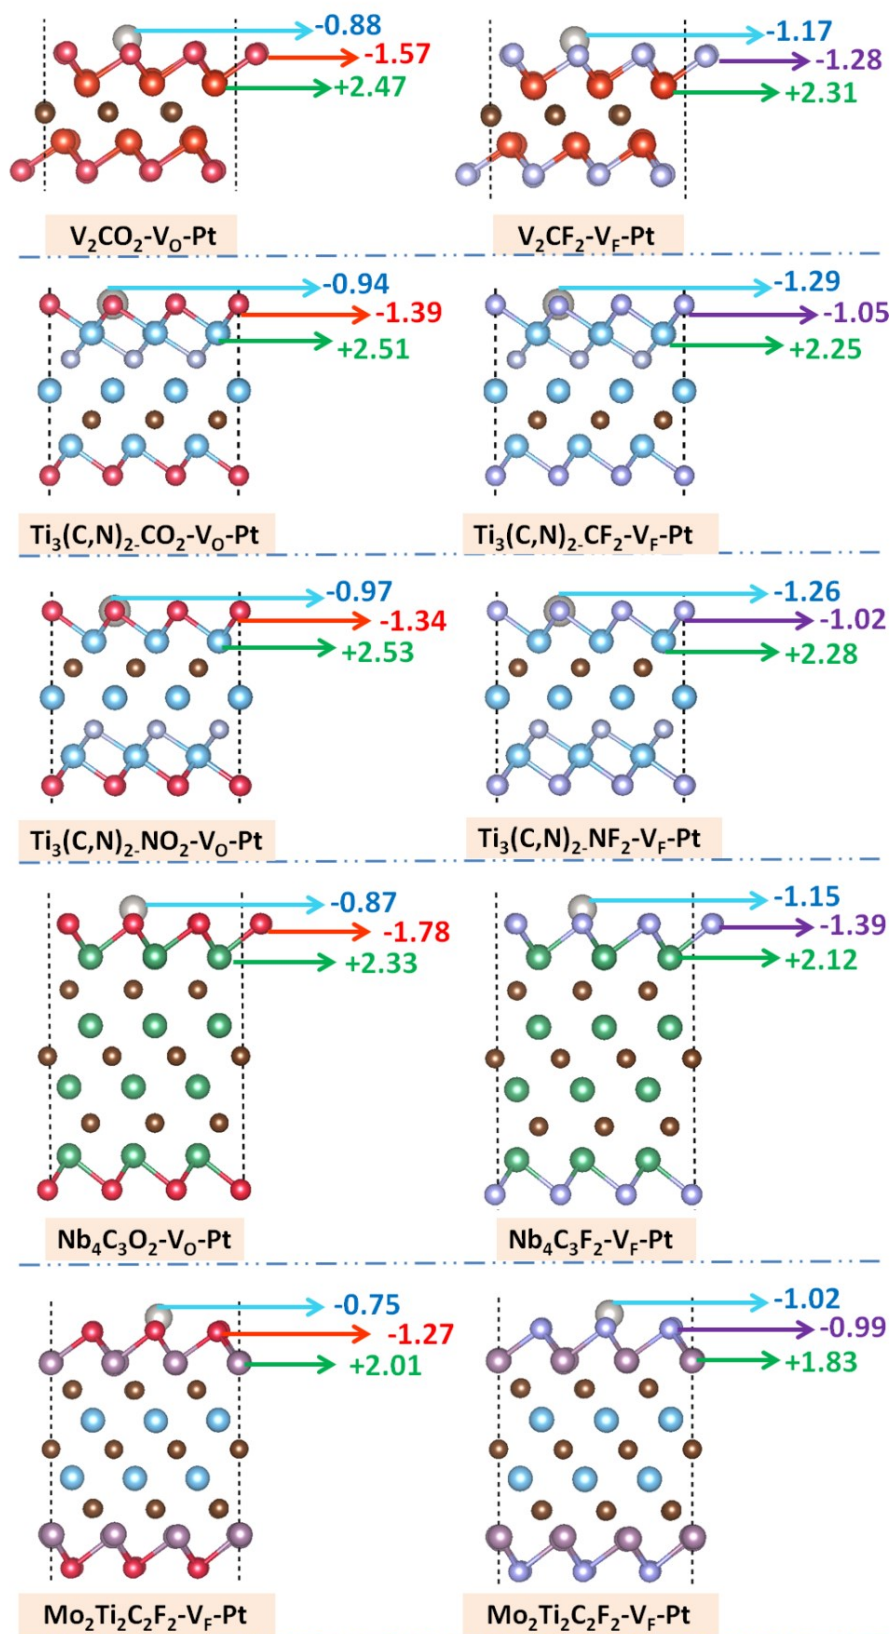

**Figure S17.** Bader charge populations of the Pt doped recombinant SACs.

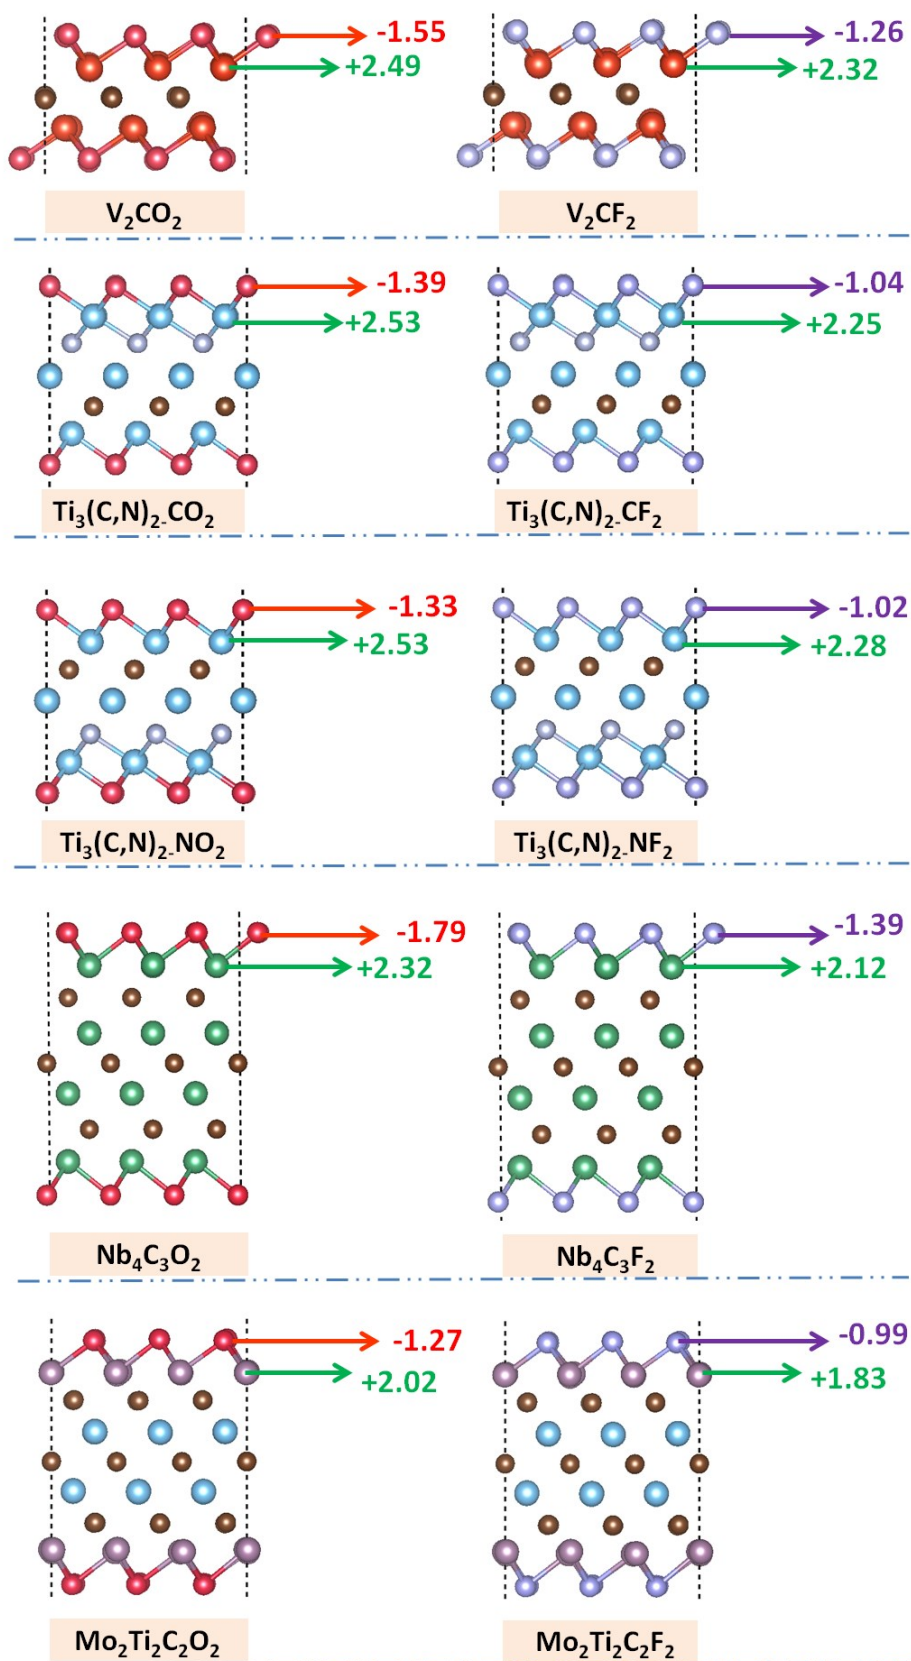

**Figure S18.** Bader charge populations of the O/F terminated MXenes.

**Table S1.** The Gibbs free energy of each step on the recombinant SACs toward ORR and OER

| System                                                                   | $G_{\text{OOH}^*}$ (V) | $G_{\text{O}^*}$ (V) | $G_{\text{OH}^*}$ (V) |
|--------------------------------------------------------------------------|------------------------|----------------------|-----------------------|
| $\text{Ti}_2\text{CO}_2\text{-V}_\text{O}\text{-Pt}$                     | 4.33                   | 2.81                 | 0.77                  |
| $\text{Ti}_2\text{CF}_2\text{-V}_\text{F}\text{-Pt}$                     | 3.91                   | 2.09                 | 0.80                  |
| $\text{V}_2\text{CO}_2\text{-V}_\text{O}\text{-Pt}$                      | 4.06                   | 2.57                 | 0.88                  |
| $\text{V}_2\text{CF}_2\text{-V}_\text{F}\text{-Pt}$                      | 4.21                   | 2.69                 | 0.93                  |
| $\text{Nb}_2\text{CO}_2\text{-V}_\text{O}\text{-Pt}$                     | 3.81                   | 2.37                 | 0.75                  |
| $\text{Nb}_2\text{CF}_2\text{-V}_\text{F}\text{-Pt}$                     | 3.85                   | 2.25                 | 0.83                  |
| $\text{Mo}_2\text{CO}_2\text{-V}_\text{O}\text{-Pt}$                     | 3.88                   | 2.17                 | 0.64                  |
| $\text{Mo}_2\text{CF}_2\text{-V}_\text{F}\text{-Pt}$                     | 3.86                   | 2.15                 | 0.69                  |
| $\text{Ti}_3\text{C}_2\text{O}_2\text{-V}_\text{O}\text{-Pt}$            | 4.29                   | 2.73                 | 0.79                  |
| $\text{Ti}_3\text{C}_2\text{F}_2\text{-V}_\text{F}\text{-Pt}$            | 4.03                   | 2.15                 | 0.81                  |
| $\text{Ti}_3(\text{C,N})_2\text{-CO}_2\text{-V}_\text{O}\text{-Pt}$      | 3.82                   | 2.05                 | 0.82                  |
| $\text{Ti}_3(\text{C,N})_2\text{-CF}_2\text{-V}_\text{F}\text{-Pt}$      | 3.57                   | 1.92                 | 0.75                  |
| $\text{Ti}_3(\text{C,N})_2\text{-NO}_2\text{-V}_\text{O}\text{-Pt}$      | 4.01                   | 2.13                 | 0.83                  |
| $\text{Ti}_3(\text{C,N})_2\text{-NF}_2\text{-V}_\text{F}\text{-Pt}$      | 3.82                   | 2.12                 | 0.77                  |
| $\text{Zr}_3\text{C}_2\text{O}_2\text{-V}_\text{O}\text{-Pt}$            | 4.29                   | 2.79                 | 1.05                  |
| $\text{Zr}_3\text{C}_2\text{F}_2\text{-V}_\text{F}\text{-Pt}$            | 4.25                   | 2.81                 | 1.09                  |
| $\text{Nb}_4\text{C}_3\text{O}_2\text{-V}_\text{O}\text{-Pt}$            | 4.21                   | 2.68                 | 0.81                  |
| $\text{Nb}_4\text{C}_3\text{F}_2\text{-V}_\text{F}\text{-Pt}$            | 3.85                   | 2.24                 | 0.84                  |
| $\text{Ta}_4\text{C}_3\text{O}_2\text{-V}_\text{O}\text{-Pt}$            | 4.18                   | 2.70                 | 1.02                  |
| $\text{Cr}_2\text{TiC}_2\text{F}_2\text{-V}_\text{F}\text{-Pt}$          | 3.94                   | 2.42                 | 0.85                  |
| $\text{Mo}_2\text{TiC}_2\text{O}_2\text{-V}_\text{O}\text{-Pt}$          | 3.91                   | 2.14                 | 0.67                  |
| $\text{Mo}_2\text{TiC}_2\text{F}_2\text{-V}_\text{F}\text{-Pt}$          | 3.82                   | 2.11                 | 0.69                  |
| $\text{Mo}_2\text{Ti}_2\text{C}_3\text{O}_2\text{-V}_\text{O}\text{-Pt}$ | 4.18                   | 2.67                 | 0.69                  |
| $\text{Mo}_2\text{Ti}_2\text{C}_3\text{F}_2\text{-V}_\text{F}\text{-Pt}$ | 3.99                   | 2.23                 | 0.71                  |



**Table S2** The solvation energy corrections ( $\Delta\text{Sol}$ ) and the free energies after considering the solvation effect ( $\Delta G_{\text{sol}}$ ) on  $\text{Nb}_2\text{CF}_2\text{-V}_\text{F}\text{-Pt}$ ,  $\text{Nb}_4\text{C}_3\text{F}_2\text{-V}_\text{F}\text{-Pt}$  and  $\text{Cr}_2\text{TiC}_2\text{F}_2\text{-V}_\text{F}\text{-Pt}$ .

|                                                                                   | $\Delta\text{Sol}$ (eV) |              |              | $\Delta G_{\text{sol}}$ (V) |             |             |
|-----------------------------------------------------------------------------------|-------------------------|--------------|--------------|-----------------------------|-------------|-------------|
|                                                                                   | *OOH                    | *O           | *OH          | *OOH                        | *O          | *OH         |
| <b><math>\text{Nb}_2\text{CF}_2\text{-V}_\text{F}\text{-Pt}</math></b>            | <b>-0.45</b>            | <b>-0.50</b> | <b>-0.56</b> | <b>4.02</b>                 | <b>2.39</b> | <b>0.80</b> |
| <b><math>\text{Nb}_4\text{C}_3\text{F}_2\text{-V}_\text{F}\text{-Pt}</math></b>   | <b>-0.44</b>            | <b>-0.51</b> | <b>-0.54</b> | <b>4.04</b>                 | <b>2.36</b> | <b>0.79</b> |
| <b><math>\text{Cr}_2\text{TiC}_2\text{F}_2\text{-V}_\text{F}\text{-Pt}</math></b> | <b>-0.37</b>            | <b>-0.42</b> | <b>-0.53</b> | <b>4.07</b>                 | <b>2.54</b> | <b>0.95</b> |

**Table S3** The energy corrections and the adsorption free energies in ORR and OER on all the catalysts.

|             | $\Delta\text{ZPE}$                                                     | TS          | $\Delta\text{ZPE}$                                                     | TS          |
|-------------|------------------------------------------------------------------------|-------------|------------------------------------------------------------------------|-------------|
|             | <b><math>\text{Ti}_2\text{CO}_2\text{-V}_\text{O}\text{-Pt}</math></b> |             | <b><math>\text{Ti}_2\text{CF}_2\text{-V}_\text{F}\text{-Pt}</math></b> |             |
| <b>*OOH</b> | <b>0.49</b>                                                            | <b>0.29</b> | <b>0.50</b>                                                            | <b>0.30</b> |
| <b>*O</b>   | <b>0.08</b>                                                            | <b>0.13</b> | <b>0.12</b>                                                            | <b>0.11</b> |
| <b>*OH</b>  | <b>0.42</b>                                                            | <b>0.11</b> | <b>0.41</b>                                                            | <b>0.10</b> |
|             | <b><math>\text{V}_2\text{CO}_2\text{-V}_\text{O}\text{ Pt}</math></b>  |             | <b><math>\text{V}_2\text{CF}_2\text{-V}_\text{F}\text{-Pt}</math></b>  |             |
| <b>*OOH</b> | <b>0.51</b>                                                            | <b>0.27</b> | <b>0.52</b>                                                            | <b>0.25</b> |
| <b>*O</b>   | <b>0.11</b>                                                            | <b>0.13</b> | <b>0.12</b>                                                            | <b>0.14</b> |
| <b>*OH</b>  | <b>0.41</b>                                                            | <b>0.12</b> | <b>0.38</b>                                                            | <b>0.11</b> |
|             | <b><math>\text{Nb}_2\text{CO}_2\text{-V}_\text{O}\text{-Pt}</math></b> |             | <b><math>\text{Nb}_2\text{CF}_2\text{-V}_\text{F}\text{-Pt}</math></b> |             |
| <b>*OOH</b> | <b>0.52</b>                                                            | <b>0.26</b> | <b>0.52</b>                                                            | <b>0.27</b> |
| <b>*O</b>   | <b>0.10</b>                                                            | <b>0.13</b> | <b>0.10</b>                                                            | <b>0.12</b> |
| <b>*OH</b>  | <b>0.40</b>                                                            | <b>0.13</b> | <b>0.39</b>                                                            | <b>0.13</b> |
|             | <b><math>\text{Mo}_2\text{CO}_2\text{-V}_\text{O}\text{-Pt}</math></b> |             | <b><math>\text{Mo}_2\text{CF}_2\text{-V}_\text{F}\text{-Pt}</math></b> |             |
| <b>*OOH</b> | <b>0.50</b>                                                            | <b>0.28</b> | <b>0.50</b>                                                            | <b>0.28</b> |
| <b>*O</b>   | <b>0.11</b>                                                            | <b>0.12</b> | <b>0.12</b>                                                            | <b>0.12</b> |

|             |                                                                                |             |                                                                                |             |
|-------------|--------------------------------------------------------------------------------|-------------|--------------------------------------------------------------------------------|-------------|
| <b>*OH</b>  | <b>0.39</b>                                                                    | <b>0.14</b> | <b>0.41</b>                                                                    | <b>0.12</b> |
|             | <b>Ti<sub>3</sub>C<sub>2</sub>O<sub>2</sub>-V<sub>O</sub>-Pt</b>               |             | <b>Ti<sub>3</sub>C<sub>2</sub>F<sub>2</sub>-V<sub>F</sub>-Pt</b>               |             |
| <b>*OOH</b> | <b>0.53</b>                                                                    | <b>0.28</b> | <b>0.51</b>                                                                    | <b>0.26</b> |
| <b>*O</b>   | <b>0.12</b>                                                                    | <b>0.13</b> | <b>0.12</b>                                                                    | <b>0.10</b> |
| <b>*OH</b>  | <b>0.40</b>                                                                    | <b>0.11</b> | <b>0.40</b>                                                                    | <b>0.12</b> |
|             | <b>Ti<sub>3</sub>(C,N)<sub>2</sub>-CO<sub>2</sub>-V<sub>O</sub>-Pt</b>         |             | <b>Ti<sub>3</sub>(C,N)<sub>2</sub>-CF<sub>2</sub>-V<sub>F</sub>-Pt</b>         |             |
| <b>*OOH</b> | <b>0.52</b>                                                                    | <b>0.28</b> | <b>0.52</b>                                                                    | <b>0.29</b> |
| <b>*O</b>   | <b>0.11</b>                                                                    | <b>0.12</b> | <b>0.11</b>                                                                    | <b>0.13</b> |
| <b>*OH</b>  | <b>0.41</b>                                                                    | <b>0.13</b> | <b>0.41</b>                                                                    | <b>0.11</b> |
|             | <b>Ti<sub>3</sub>(C,N)<sub>2</sub>-NO<sub>2</sub>-V<sub>O</sub>-Pt</b>         |             | <b>Ti<sub>3</sub>(C,N)<sub>2</sub>-NF<sub>2</sub>-V<sub>F</sub>-Pt</b>         |             |
| <b>*OOH</b> | <b>0.50</b>                                                                    | <b>0.26</b> | <b>0.53</b>                                                                    | <b>0.28</b> |
| <b>*O</b>   | <b>0.12</b>                                                                    | <b>0.12</b> | <b>0.12</b>                                                                    | <b>0.11</b> |
| <b>*OH</b>  | <b>0.41</b>                                                                    | <b>0.12</b> | <b>0.42</b>                                                                    | <b>0.13</b> |
|             | <b>Zr<sub>3</sub>C<sub>2</sub>O<sub>2</sub>-V<sub>O</sub>-Pt</b>               |             | <b>Zr<sub>3</sub>C<sub>2</sub>F<sub>2</sub>-V<sub>F</sub>-Pt</b>               |             |
| <b>*OOH</b> | <b>0.52</b>                                                                    | <b>0.25</b> | <b>0.49</b>                                                                    | <b>0.27</b> |
| <b>*O</b>   | <b>0.11</b>                                                                    | <b>0.14</b> | <b>0.10</b>                                                                    | <b>0.12</b> |
| <b>*OH</b>  | <b>0.41</b>                                                                    | <b>0.10</b> | <b>0.40</b>                                                                    | <b>0.09</b> |
|             | <b>Nb<sub>4</sub>C<sub>3</sub>O<sub>2</sub>-V<sub>O</sub>-Pt</b>               |             | <b>Nb<sub>4</sub>C<sub>3</sub>F<sub>2</sub>-V<sub>F</sub>-Pt</b>               |             |
| <b>*OOH</b> | <b>0.53</b>                                                                    | <b>0.29</b> | <b>0.52</b>                                                                    | <b>0.36</b> |
| <b>*O</b>   | <b>0.10</b>                                                                    | <b>0.13</b> | <b>0.10</b>                                                                    | <b>0.10</b> |
| <b>*OH</b>  | <b>0.39</b>                                                                    | <b>0.11</b> | <b>0.38</b>                                                                    | <b>0.12</b> |
|             | <b>Ta<sub>4</sub>C<sub>3</sub>O<sub>2</sub>-V<sub>O</sub>-Pt</b>               |             | <b>Cr<sub>2</sub>TiC<sub>2</sub>F<sub>2</sub>-V<sub>F</sub>-Pt</b>             |             |
| <b>*OOH</b> | <b>0.49</b>                                                                    | <b>0.27</b> | <b>0.51</b>                                                                    | <b>0.26</b> |
| <b>*O</b>   | <b>0.10</b>                                                                    | <b>0.13</b> | <b>0.11</b>                                                                    | <b>0.12</b> |
| <b>*OH</b>  | <b>0.43</b>                                                                    | <b>0.13</b> | <b>0.41</b>                                                                    | <b>0.13</b> |
|             | <b>Mo<sub>2</sub>TiC<sub>2</sub>O<sub>2</sub>-V<sub>O</sub>-Pt</b>             |             | <b>Mo<sub>2</sub>TiC<sub>2</sub>F<sub>2</sub>-V<sub>F</sub>-Pt</b>             |             |
| <b>*OOH</b> | <b>0.48</b>                                                                    | <b>0.30</b> | <b>0.50</b>                                                                    | <b>0.29</b> |
| <b>*O</b>   | <b>0.11</b>                                                                    | <b>0.11</b> | <b>0.12</b>                                                                    | <b>0.11</b> |
| <b>*OH</b>  | <b>0.39</b>                                                                    | <b>0.12</b> | <b>0.38</b>                                                                    | <b>0.14</b> |
|             | <b>Mo<sub>2</sub>Ti<sub>2</sub>C<sub>3</sub>O<sub>2</sub>-V<sub>O</sub>-Pt</b> |             | <b>Mo<sub>2</sub>Ti<sub>2</sub>C<sub>3</sub>F<sub>2</sub>-V<sub>F</sub>-Pt</b> |             |
| <b>*OOH</b> | <b>0.51</b>                                                                    | <b>0.28</b> | <b>0.52</b>                                                                    | <b>0.27</b> |

|     |       |      |      |      |
|-----|-------|------|------|------|
| *O  | 0.0.8 | 0.12 | 0.13 | 0.12 |
| *OH | 0.41  | 0.12 | 0.38 | 0.11 |

### The reaction energies barriers of ORR/OER on Cr<sub>2</sub>TiC<sub>2</sub>F<sub>2</sub>-V<sub>F</sub>-Pt

The possible reaction pathways and the reaction barrier of ORR/OER on Cr<sub>2</sub>TiC<sub>2</sub>F<sub>2</sub>-V<sub>F</sub>-Pt were summarized in Figure S15. For the ORR processes, the adsorbed O<sub>2</sub> molecule went through a sequential coupled proton-electron transfer process to form H<sub>2</sub>O firstly. Then, \*OOH was formed which dissociated to \*O and \*OH with an activation barrier of 0.45 eV. This was followed by two possible reaction paths. One was the OH\* hydrogenation to release a H<sub>2</sub>O molecule firstly and then the remained \*O was reduced to \*OH and H<sub>2</sub>O with activation barriers of 0.58, 0.47, and 0.61 eV, respectively. The other was the \*O reduced to form \*OH and H<sub>2</sub>O with activation barriers of 0.55 and 0.61 eV. In addition, the OER on Cr<sub>2</sub>TiC<sub>2</sub>F<sub>2</sub>-V<sub>F</sub>-Pt was followed by a reversed process of ORR, where the rate-limiting reaction barrier was the H<sub>2</sub>O dissociation, with an energy barrier of 0.61 eV.

### More calculation details

The adsorption energies of oxygen-containing intermediates on catalysts were calculated by Eq. (1)-(3):

$$\Delta E_{O^*} = E_{O^*} - E_* - [E_{H_2O} - E_{H_2}] \quad (1)$$

$$\Delta E_{OH^*} = E_{OH^*} - E_* - [E_{H_2O} - 1/2E_{H_2}] \quad (2)$$

$$\Delta E_{OOH^*} = E_{OOH^*} - E_* - [2E_{H_2O} - 3/2E_{H_2}] \quad (3)$$

where E\*, E<sub>OOH\*</sub>, E<sub>OH\*</sub>, and E<sub>O\*</sub> were the total energies of the catalyst substrate without and with the adsorption of OOH, OH, and O. E<sub>H<sub>2</sub>O</sub> and E<sub>H<sub>2</sub></sub> were the total energies of free H<sub>2</sub>O and H<sub>2</sub> molecules in gas phases, respectively. The Gibbs free energies ( $\Delta G$ ) of the ORR intermediates can be obtained from the computational hydrogen electrode (CHE) model proposed by Nørskov et al (J. Phys. Chem. B 2004, 108, 46, 17886-17892). The free energy change is defined as

$$\Delta G = \Delta E + \Delta ZPE - T \Delta S + \Delta G_U + \Delta G_{pH} \quad (4)$$

where  $\Delta E$  was the reaction energy obtained from the DFT calculations,  $\Delta ZPE$  was the zero-point energy change, T was the temperature (298.15 K in this work), and  $\Delta S$  was the entropy

change.  $\Delta G_U = -neU$ , where  $n$  was the number of electrons transferred and  $U$  was the electrode potential.  $G_{pH}$  was refer to the corrected free energy of the  $H^+$  ion concentration; the pH was assumed to be zero for the acid media Besides, the ZPE and S for the adsorbed ORR intermediates were obtained from the calculation of the vibrational frequencies, while the ZPE and S values of the free gas molecules were obtained from the NIST database (ACS Catal. 2014, 4, 2, 674-680). The ZPE values of the adsorbed ORR species are similar among different substrates, including pure metals, metal alloys, oxides, two-dimensional materials and so on. The free energy of  $1/2 H_2$  is used instead of  $(H^+ + e^-)$ . The free energy of  $O_2$  was calculated according to the following equation:

$$G_{O_2}(g) = 2G_{H_2O}(l) + 2G_{H_2} - 4 \times 1.23 \text{ (eV)} \quad (5)$$

The energy correction of the solvation energy ( $\Delta Sol$ ) was defined by the following equations (equation 6-7):

$$\Delta Sol = E_{tot} - E_{(sur + adsorbate)} - E_{water} + E_{(sur + water)} \quad (6)$$

$$\Delta G = \Delta E + \Delta ZPE - T \Delta S + \Delta Sol + xeU - 4eU \quad (7)$$

where  $E_{tot}$ ,  $E_{(sur + adsorbate)}$ ,  $E_{water}$ , and  $E_{(sur + water)}$  represent the computed electronic energies of the surface with the adsorbates as well as the single water layer, the surface with the adsorbates only, the single water layer, and the surface with single water layer only, respectively. The number of transferred electrons  $x$  was 1-3 for the  $OOH^*$ ,  $O^*$ , and  $OH^*$  intermediates, respectively.
